# Supplementary material
Source: PubMed Central journal article supplement (PMC5809778)
Supplement: npp2017117x1.pdf [file npp2017117x1.pdf]

# Supplementary Table 1

| ADOLESCENT (P42-45)<br><b>NAcc-Projecting</b> | <i>Prelimbic Layer 5/6</i> |                      | <i>Prelimbic Layer 2/3</i> |                     | <i>Infralimbic Layer 5/6</i> |                      | <i>Infralimbic Layer 2/3</i> |                     |
|-----------------------------------------------|----------------------------|----------------------|----------------------------|---------------------|------------------------------|----------------------|------------------------------|---------------------|
|                                               | <u>Air</u>                 | <u>Toluene</u>       | <u>Air</u>                 | <u>Toluene</u>      | <u>Air</u>                   | <u>Toluene</u>       | <u>Air</u>                   | <u>Toluene</u>      |
| # of neurons                                  | 11                         | 12                   | 7                          | 7                   | 8                            | 9                    | 6                            | 7                   |
| Rheobase (pA)                                 | 120.5 ± 5.7                | <b>222.9 ± 20.5*</b> | 153.6 ± 6.5                | <b>189.3 ± 24.3</b> | 256.3 ± 30.1                 | <b>147.2 ± 14.1*</b> | 237.5 ± 32.1                 | <b>164.3 ± 26.1</b> |
| Threshold (mV)                                | -35.8 ± 0.9                | <b>-35.1 ± 1.1</b>   | -33.9 ± 1.0                | <b>-36.8 ± 1.0</b>  | -35.4 ± 1.3                  | <b>-35.7 ± 1.1</b>   | -33.5 ± 1.3                  | <b>-34.5 ± 0.9</b>  |
| Peak (mV)                                     | 71.5 ± 2.1                 | <b>73.0 ± 1.3</b>    | 72.5 ± 2.3                 | <b>74.2 ± 1.9</b>   | 73.0 ± 2.3                   | <b>75.8 ± 1.7</b>    | 71.3 ± 2.3                   | <b>74.7 ± 0.7</b>   |
| AHP (mV)                                      | -15.0 ± 1.4                | <b>-13.3 ± 1.1</b>   | -18.5 ± 1.2                | <b>-13.2 ± 1.4*</b> | -15.2 ± 0.6                  | <b>-13.3 ± 0.6*</b>  | -15.6 ± 1.4                  | <b>-14.8 ± 1.7</b>  |
| ½ Duration (mV)                               | 0.78 ± 0.05                | <b>0.91 ± 0.03*</b>  | 0.91 ± 0.04                | <b>0.89 ± 0.05</b>  | 0.85 ± 0.05                  | <b>0.92 ± 0.03</b>   | 0.93 ± 0.08                  | <b>0.92 ± 0.04</b>  |
| Membrane Resistance (MΩ)                      | 53.7 ± 6.1                 | <b>38.3 ± 3.1*</b>   | 45.6 ± 9.6                 | <b>41.0 ± 4.8</b>   | 40.0 ± 5.7                   | <b>51.3 ± 4.3</b>    | 35.1 ± 4.8                   | <b>44.8 ± 6.3</b>   |
| IH Amplitude (mV)                             | -4.6 ± 0.5                 | <b>-2.2 ± 0.3*</b>   | -2.8 ± 0.7                 | <b>-1.8 ± 0.4</b>   | -3.2 ± 0.4                   | <b>-4.0 ± 0.6</b>    | -2.1 ± 0.2                   | <b>-3.0 ± 0.5</b>   |

  

| ADOLESCENT (P42-45)<br><b>NAcc-Projecting</b> | <i>Prelimbic Layer 5/6</i> |                     | <i>Prelimbic Layer 2/3</i> |                     | <i>Infralimbic Layer 5/6</i> |                      | <i>Infralimbic Layer 2/3</i> |                     |
|-----------------------------------------------|----------------------------|---------------------|----------------------------|---------------------|------------------------------|----------------------|------------------------------|---------------------|
|                                               | <u>Air</u>                 | <u>Toluene</u>      | <u>Air</u>                 | <u>Toluene</u>      | <u>Air</u>                   | <u>Toluene</u>       | <u>Air</u>                   | <u>Toluene</u>      |
| # of neurons                                  | 8                          | 8                   | 7                          | 7                   | 9                            | 10                   | 7                            | 8                   |
| Rheobase (pA)                                 | 134.4 ± 21.6               | <b>168.8 ± 15.5</b> | 150.0 ± 15.4               | <b>196.4 ± 20.7</b> | 141.7 ± 20.8                 | <b>242.5 ± 31.0*</b> | 207.1 ± 26.6                 | <b>181.3 ± 42.7</b> |
| Threshold (mV)                                | -34.9 ± 1.0                | <b>-35.8 ± 1.6</b>  | -33.3 ± 1.9                | <b>-32.0 ± 1.9</b>  | -31.5 ± 1.2                  | <b>-30.7 ± 1.0</b>   | -31.7 ± 1.5                  | <b>-30.1 ± 1.1</b>  |
| Peak (mV)                                     | 72.8 ± 2.1                 | <b>72.7 ± 1.9</b>   | 75.3 ± 1.9                 | <b>68.9 ± 2.6</b>   | 69.7 ± 2.3                   | <b>71.4 ± 2.1</b>    | 70.8 ± 2.7                   | <b>68.7 ± 2.7</b>   |
| AHP (mV)                                      | -17.7 ± 1.4                | <b>-14.9 ± 1.6</b>  | -16.8 ± 1.3                | <b>-14.5 ± 1.7</b>  | -17.7 ± 1.3                  | <b>-16.5 ± 1.2</b>   | -18.3 ± 0.9                  | <b>-17.4 ± 0.6</b>  |
| ½ Duration (mV)                               | 0.93 ± 0.05                | <b>0.98 ± 0.07</b>  | 1.06 ± 0.04                | <b>1.36 ± 0.24</b>  | 1.05 ± 0.05                  | <b>1.29 ± 0.1*</b>   | 1.11 ± 0.05                  | <b>1.14 ± 0.06</b>  |
| Membrane Resistance (MΩ)                      | 48.9 ± 7.5                 | <b>64.2 ± 8.1</b>   | 64.4 ± 2.5                 | <b>51.8 ± 6.0</b>   | 57.3 ± 11.4                  | <b>62.0 ± 16.5</b>   | 61.3 ± 10.6                  | <b>79.6 ± 13.1</b>  |
| IH Amplitude (mV)                             | -4.2 ± 0.6                 | <b>-3.4 ± 0.5</b>   | -4.0 ± 0.7                 | <b>-3.3 ± 0.7</b>   | -4.7 ± 0.5                   | <b>-2.9 ± 0.3*</b>   | -2.8 ± 0.3                   | <b>-4.3 ± 0.9</b>   |

  

| ADULT (P99-102)<br><b>NAcc-Projecting</b> | <i>Prelimbic Layer 5/6</i> |                     | <i>Prelimbic Layer 2/3</i> |                     | <i>Infralimbic Layer 5/6</i> |                     | <i>Infralimbic Layer 2/3</i> |                     |
|-------------------------------------------|----------------------------|---------------------|----------------------------|---------------------|------------------------------|---------------------|------------------------------|---------------------|
|                                           | <u>Air</u>                 | <u>Toluene</u>      | <u>Air</u>                 | <u>Toluene</u>      | <u>Air</u>                   | <u>Toluene</u>      | <u>Air</u>                   | <u>Toluene</u>      |
| # of neurons                              | 8                          | 8                   | 6                          | 6                   | 7                            | 7                   | 7                            | 6                   |
| Rheobase (pA)                             | 175.0 ± 23.0               | <b>240.6 ± 32.7</b> | 254.2 ± 26.2               | <b>241.7 ± 26.4</b> | 264.3 ± 43.3                 | <b>178.6 ± 31.1</b> | 192.9 ± 41.4                 | <b>275.0 ± 36.5</b> |
| Threshold (mV)                            | -33.7 ± 1.4                | <b>-34.2 ± 1.3</b>  | -33.6 ± 1.7                | <b>-33.2 ± 1.2</b>  | -35.5 ± 0.5                  | <b>-34.2 ± 1.6</b>  | -33.4 ± 1.9                  | <b>-31.7 ± 2.2</b>  |
| Peak (mV)                                 | 74.4 ± 2.9                 | <b>70.3 ± 2.6</b>   | 65.4 ± 3.0                 | <b>73.1 ± 2.0</b>   | 74.4 ± 1.0                   | <b>74.7 ± 2.4</b>   | 66.9 ± 1.4                   | <b>68.7 ± 3.3</b>   |
| AHP (mV)                                  | -15.1 ± 1.6                | <b>-13.2 ± 2.0</b>  | -14.3 ± 1.5                | <b>-12.2 ± 1.4</b>  | -13.4 ± 1.1                  | <b>-13.5 ± 1.9</b>  | -14.4 ± 1.2                  | <b>-14.4 ± 1.1</b>  |
| ½ Duration (mV)                           | 1.11 ± 0.16                | <b>1.18 ± 0.14</b>  | 1.25 ± 0.14                | <b>1.03 ± 0.08</b>  | 0.99 ± 0.04                  | <b>0.96 ± 0.05</b>  | 1.13 ± 0.06                  | <b>1.05 ± 0.08</b>  |
| Membrane Resistance (MΩ)                  | 55.3 ± 12.7                | <b>69.6 ± 13.6</b>  | 46.9 ± 9.3                 | <b>51.5 ± 5.0</b>   | 47.0 ± 5.1                   | <b>67.0 ± 9.4</b>   | 74.9 ± 21.1                  | <b>67.1 ± 7.3</b>   |
| IH Amplitude (mV)                         | -3.7 ± 0.7                 | <b>-2.8 ± 0.5</b>   | -2.4 ± 0.6                 | <b>-2.2 ± 0.4</b>   | -3.0 ± 0.6                   | <b>-3.2 ± 0.4</b>   | -2.2 ± 0.6                   | <b>-1.7 ± 0.4</b>   |

  

| ADULT (P99-102)<br><b>NAcc-Projecting</b> | <i>Prelimbic Layer 5/6</i> |                     | <i>Prelimbic Layer 2/3</i> |                     | <i>Infralimbic Layer 5/6</i> |                     | <i>Infralimbic Layer 2/3</i> |                     |
|-------------------------------------------|----------------------------|---------------------|----------------------------|---------------------|------------------------------|---------------------|------------------------------|---------------------|
|                                           | <u>Air</u>                 | <u>Toluene</u>      | <u>Air</u>                 | <u>Toluene</u>      | <u>Air</u>                   | <u>Toluene</u>      | <u>Air</u>                   | <u>Toluene</u>      |
| # of neurons                              | 7                          | 6                   | 6                          | 6                   | 9                            | 7                   | 7                            | 6                   |
| Rheobase (pA)                             | 128.6 ± 6.5                | <b>108.3 ± 25.6</b> | 170.8 ± 22.8               | <b>191.7 ± 24.7</b> | 133.3 ± 17.7                 | <b>171.4 ± 20.0</b> | 153.6 ± 24.7                 | <b>183.3 ± 23.0</b> |
| Threshold (mV)                            | -33.7 ± 0.9                | <b>-35.8 ± 2.0</b>  | -33.4 ± 1.5                | <b>-33.1 ± 0.5</b>  | -32.8 ± 1.8                  | <b>-31.9 ± 1.5</b>  | -34.5 ± 1.5                  | <b>-34.0 ± 0.9</b>  |
| Peak (mV)                                 | 74.3 ± 1.6                 | <b>72.5 ± 1.6</b>   | 77.1 ± 3.1                 | <b>74.3 ± 3.3</b>   | 70.3 ± 2.2                   | <b>76.5 ± 2.9</b>   | 70.0 ± 3.4                   | <b>76.1 ± 2.1</b>   |
| AHP (mV)                                  | -15.6 ± 0.9                | <b>-16.0 ± 2.7</b>  | -16.7 ± 0.8                | <b>-14.7 ± 1.5</b>  | -16.5 ± 1.4                  | <b>-15.1 ± 2.2</b>  | -15.2 ± 1.5                  | <b>-15.4 ± 1.0</b>  |
| ½ Duration (mV)                           | 1.02 ± 0.08                | <b>0.90 ± 0.06</b>  | 1.03 ± 0.06                | <b>0.98 ± 0.08</b>  | 1.15 ± 0.05                  | <b>1.06 ± 0.11</b>  | 1.24 ± 0.08                  | <b>1.02 ± 0.07</b>  |
| Membrane Resistance (MΩ)                  | 95.5 ± 32.4                | <b>105.4 ± 40.4</b> | 44.7 ± 5.4                 | <b>49.2 ± 2.3</b>   | 90.7 ± 19.4                  | <b>58.7 ± 10.3</b>  | 62.2 ± 5.0                   | <b>63.3 ± 13.1</b>  |
| IH Amplitude (mV)                         | -3.6 ± 0.5                 | <b>-5.2 ± 2.0</b>   | -2.1 ± 0.3                 | <b>-1.6 ± 0.2</b>   | -4.5 ± 0.9                   | <b>-3.2 ± 0.5</b>   | -2.6 ± 0.7                   | <b>-2.1 ± 0.6</b>   |

## Supplementary Table 2

| ADOLESCENT (P49-52)<br><b>NAcc-Projecting 7DWD</b> | <i>Prelimbic Layer 5/6</i> |                | <i>Prelimbic Layer 2/3</i> |                | <i>Infralimbic Layer 5/6</i> |                | <i>Infralimbic Layer 2/3</i> |                |
|----------------------------------------------------|----------------------------|----------------|----------------------------|----------------|------------------------------|----------------|------------------------------|----------------|
|                                                    | <u>Air</u>                 | <u>Toluene</u> | <u>Air</u>                 | <u>Toluene</u> | <u>Air</u>                   | <u>Toluene</u> | <u>Air</u>                   | <u>Toluene</u> |
|                                                    | 6                          | 6              | 6                          | 6              | 6                            | 6              | 6                            | 6              |
| # of neurons                                       |                            |                |                            |                |                              |                |                              |                |
| Rheobase (pA)                                      | 133.3 ± 17.9               | 132.3 ± 17.8   | 154.2 ± 24.5               | 208.3 ± 26.4   | 191.7 ± 23.9                 | 145.8 ± 15.0   | 204.2 ± 21.8                 | 200.0 ± 28.1   |
| Threshold (mV)                                     | -35.3 ± 0.6                | -35.3 ± 1.4    | -34.8 ± 1.0                | -34.7 ± 1.9    | -37.2 ± 1.9                  | -32.7 ± 1.9    | -32.2 ± 1.9                  | -34.0 ± 1.8    |
| Peak (mV)                                          | 79.4 ± 3.2                 | 79.7 ± 3.8     | 81.2 ± 1.4                 | 83.2 ± 2.6     | 83.0 ± 2.4                   | 83.3 ± 1.6     | 76.2 ± 5.2                   | 81.8 ± 2.8     |
| AHP (mV)                                           | -12.2 ± 1.1                | -14.1 ± 1.5    | -18.2 ± 1.6                | -16.8 ± 0.7    | -14.4 ± 1.5                  | -17.0 ± 1.3    | -16.0 ± 2.1                  | -14.4 ± 1.6    |
| ½ Duration (mV)                                    | 0.96 ± 0.04                | 0.96 ± 0.04    | 0.96 ± 0.05                | 0.88 ± 0.05    | 0.99 ± 0.07                  | 0.96 ± 0.06    | 1.06 ± 0.05                  | 0.90 ± 0.06    |
| Membrane Resistance (MΩ)                           | 72.9 ± 11.5                | 57.7 ± 17.5    | 51.1 ± 5.4                 | 45.1 ± 4.9     | 50.5 ± 10.7                  | 64.4 ± 6.4     | 46.8 ± 7.3                   | 47.6 ± 5.7     |
| IH Amplitude (mV)                                  | -4.1 ± 0.9                 | -3.0 ± 0.5     | -3.5 ± 0.6                 | -2.5 ± 0.4     | -4.6 ± 0.7                   | -4.7 ± 0.5     | -3.6 ± 0.2                   | -2.7 ± 0.4     |

| ADOLESCENT (P49-52)<br><b>NAcc-Projecting 7DWD</b> | <i>Prelimbic Layer 5/6</i> |                | <i>Prelimbic Layer 2/3</i> |                | <i>Infralimbic Layer 5/6</i> |                | <i>Infralimbic Layer 2/3</i> |                |
|----------------------------------------------------|----------------------------|----------------|----------------------------|----------------|------------------------------|----------------|------------------------------|----------------|
|                                                    | <u>Air</u>                 | <u>Toluene</u> | <u>Air</u>                 | <u>Toluene</u> | <u>Air</u>                   | <u>Toluene</u> | <u>Air</u>                   | <u>Toluene</u> |
|                                                    | 6                          | 6              | 6                          | 6              | 6                            | 6              | 6                            | 6              |
| # of neurons                                       |                            |                |                            |                |                              |                |                              |                |
| Rheobase (pA)                                      | 129.2 ± 19.8               | 129.2 ± 20.8   | 208.3 ± 21.1               | 183.3 ± 12.4   | 183.3 ± 22.1                 | 145.8 ± 19.8   | 229.2 ± 31.2                 | 158.3 ± 12.4   |
| Threshold (mV)                                     | -39.3 ± 1.4                | -35.0 ± 1.6    | -34.2 ± 1.9                | -33.5 ± 2.0    | -35.7 ± 2.0                  | -34.0 ± 1.2    | -36.8 ± 1.2                  | -33.9 ± 1.1    |
| Peak (mV)                                          | 76.5 ± 3.5                 | 73.5 ± 2.4     | 79.8 ± 4.0                 | 71.3 ± 2.3     | 76.0 ± 2.3                   | 75.1 ± 2.7     | 80.7 ± 3.9                   | 69.4 ± 3.9     |
| AHP (mV)                                           | -15.2 ± 1.5                | -18.2 ± 0.7    | -15.9 ± 0.8                | -18.1 ± 1.7    | -14.4 ± 0.8                  | -16.8 ± 1.2    | -16.8 ± 1.1                  | -16.5 ± 0.9    |
| ½ Duration (mV)                                    | 1.07 ± 0.06                | 0.98 ± 0.08    | 1.03 ± 0.05                | 0.92 ± 0.04    | 1.00 ± 0.03                  | 0.97 ± 0.06    | 0.97 ± 0.06                  | 1.03 ± 0.05    |
| Membrane Resistance (MΩ)                           | 44.3 ± 6.6                 | 52.3 ± 5.0     | 37.4 ± 4.2                 | 59.9 ± 4.9*    | 32.0 ± 1.3                   | 57.8 ± 5.7*    | 39.0 ± 6.1                   | 58.7 ± 3.6*    |
| IH Amplitude (mV)                                  | -4.9 ± 0.5                 | -4.2 ± 0.2     | -3.5 ± 0.3                 | -4.0 ± 0.4     | -3.7 ± 0.5                   | -4.2 ± 0.6     | -3.1 ± 0.3                   | -3.8 ± 0.3     |

### Supplementary Table 3

| ADOLESCENT (P42-45)<br>NAcc-Projecting ZD7288 | <i>Prelimbic Layer 5/6</i> |                     | <i>Prelimbic Layer 5/6</i>     |                    |
|-----------------------------------------------|----------------------------|---------------------|--------------------------------|--------------------|
|                                               | <u>Air</u>                 | <u>Air+ZD</u>       | <u>Toluene</u>                 | <u>Toluene+ZD</u>  |
|                                               | 6                          | 6                   | 6                              | 6                  |
| # of neurons                                  |                            |                     |                                |                    |
| Rheobase (pA)                                 | 129.2 ± 15.0               | <b>58.3 ± 12.4*</b> | 145.8 ± 7.7                    | 129.2 ± 15.0       |
| Threshold (mV)                                | -32.9 ± 2.4                | <b>-35.0 ± 1.8</b>  | -32.4 ± 1.7                    | <b>-32.3 ± 1.7</b> |
| Peak (mV)                                     | 75.7 ± 1.6                 | <b>75.3 ± 3.4</b>   | 77.1 ± 4.8                     | <b>75.6 ± 4.9</b>  |
| AHP (mV)                                      | -16.8 ± 0.6                | <b>-15.8 ± 1.3</b>  | -15.5 ± 1.8                    | <b>-11.6 ± 1.6</b> |
| ½ Duration (mV)                               | 0.85 ± 0.03                | <b>0.91 ± 0.07</b>  | <b>1.00 ± 0.06<sup>#</sup></b> | <b>1.16 ± 0.11</b> |
| IH Amplitude (mV)                             | -3.1 ± 0.4                 | <b>-0.8 ± 0.3*</b>  | <b>-1.8 ± 0.4<sup>#</sup></b>  | <b>-0.9 ± 0.3</b>  |

| ADOLESCENT (P42-45)<br>NAcc-Projecting SB | <i>Prelimbic Layer 5/6</i> |                     | <i>Prelimbic Layer 5/6</i>     |                     | <i>Infralimbic Layer 5/6</i> |                     | <i>Infralimbic Layer 5/6</i> |                     |
|-------------------------------------------|----------------------------|---------------------|--------------------------------|---------------------|------------------------------|---------------------|------------------------------|---------------------|
|                                           | <u>Air</u>                 | <u>Air+SB</u>       | <u>Toluene</u>                 | <u>Toluene+SB</u>   | <u>Air</u>                   | <u>Air+SB</u>       | <u>Toluene</u>               | <u>Toluene+SB</u>   |
|                                           | 6                          | 6                   | 6                              | 6                   | 6                            | 6                   | 6                            | 6                   |
| # of neurons                              |                            |                     |                                |                     |                              |                     |                              |                     |
| Rheobase (pA)                             | 120.8 ± 11.9               | <b>112.5 ± 12.5</b> | 116.7 ± 17.9                   | <b>100.0 ± 18.3</b> | 179.2 ± 23.6                 | <b>175.0 ± 21.4</b> | 129.1 ± 22.8                 | <b>137.5 ± 20.2</b> |
| Threshold (mV)                            | -34.3 ± 1.7                | <b>-34.8 ± 2.0</b>  | -36.1 ± 1.6                    | <b>-35.9 ± 1.4</b>  | -34.3 ± 1.7                  | <b>-33.5 ± 1.5</b>  | -29.7 ± 2.3                  | <b>-28.2 ± 2.0</b>  |
| Peak (mV)                                 | 81.0 ± 1.2                 | <b>82.0 ± 1.1</b>   | <b>70.2 ± 2.0<sup>#</sup></b>  | <b>66.7 ± 2.9</b>   | 78.2 ± 1.0                   | <b>76.2 ± 1.5</b>   | 76.0 ± 3.9                   | <b>72.3 ± 2.1</b>   |
| AHP (mV)                                  | -15.5 ± 0.7                | <b>-16.5 ± 1.0</b>  | -15.4 ± 1.6                    | <b>-17.1 ± 1.5</b>  | -16.1 ± 1.3                  | <b>-16.7 ± 1.5</b>  | -17.8 ± 1.0                  | <b>-20.2 ± 0.9*</b> |
| ½ Duration (mV)                           | 0.84 ± 0.02                | <b>0.84 ± 0.03</b>  | <b>1.13 ± 0.05<sup>#</sup></b> | <b>1.18 ± 0.07</b>  | 0.97 ± 0.05                  | <b>1.00 ± 0.03</b>  | 0.97 ± 0.04                  | <b>0.99 ± 0.03</b>  |
| IH Amplitude (mV)                         | -4.1 ± 0.3                 | <b>-4.7 ± 0.6</b>   | <b>-3.2 ± 0.2<sup>#</sup></b>  | <b>-3.7 ± 0.4</b>   | -3.3 ± 0.8                   | <b>-3.3 ± 0.7</b>   | -3.2 ± 0.5                   | <b>-3.5 ± 0.6</b>   |

# Supplementary Figure 1

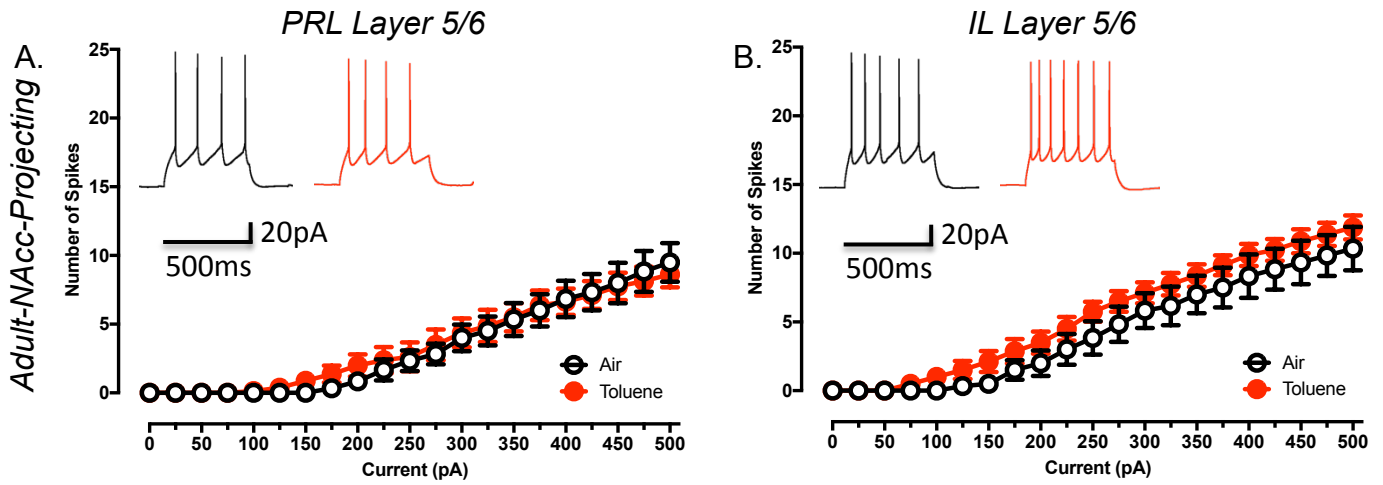

Supplementary Figure 1. A single 20-minute toluene exposure that produces high levels of sedation during adulthood has no effect on the intrinsic excitability of NAc projecting mPFC neurons. Figures show the effect of toluene exposure on firing of layer 5/6 prelimbic (A- Air: n=6, Toluene: n=8) and infralimbic (B- Air: n=6, Toluene: n=8) mPFC neurons projecting to the core of the NAc. Traces in each figure show examples of current-evoked firing (evoked with a 250 pA current step) from air (left trace) or toluene (right trace) exposed adult rats 24 hours following exposure to 10,500 ppm toluene vapor. Data are presented as mean and SEM.
